# Supplementary material
Source: PubMed Central journal article supplement (PMC2802113)

Zhou et al., Supplemental Fig. S1

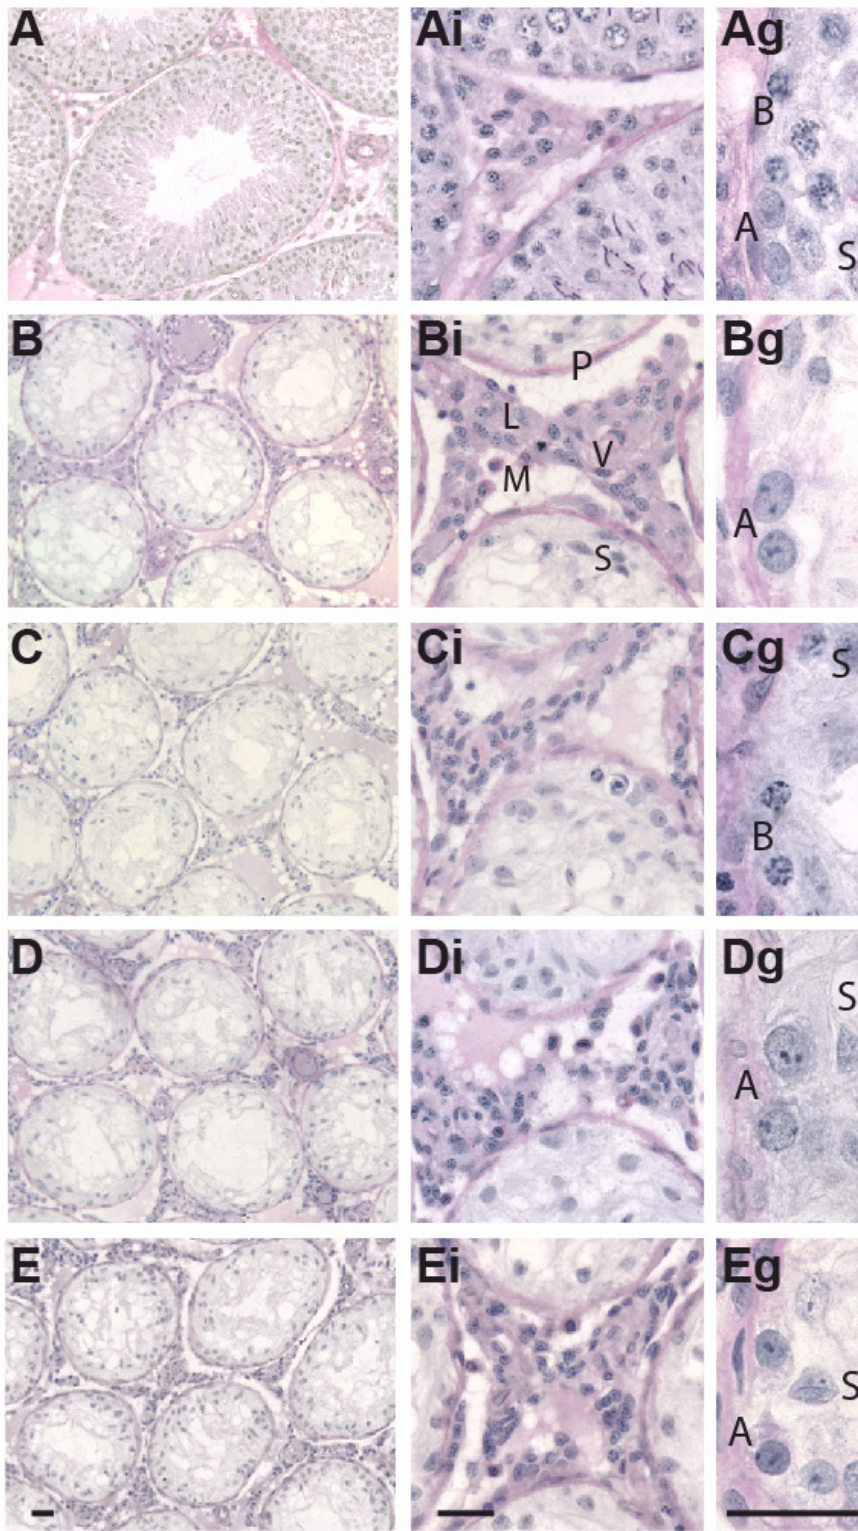

Zhou et al., Supplemental Fig. S2

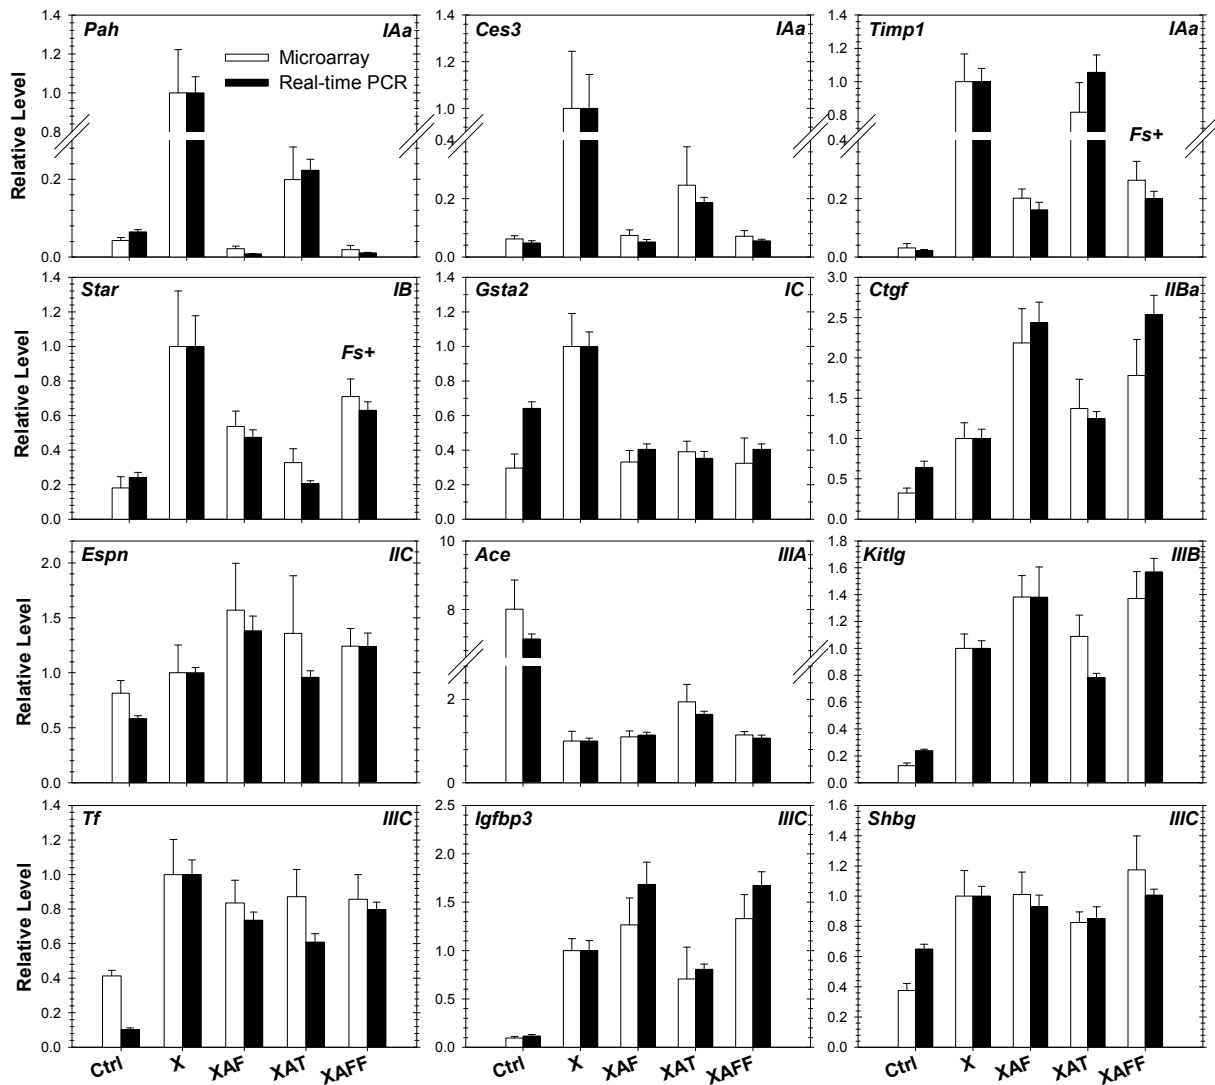

Zhou et al., Supplemental Fig. S3

**Hepatocyte**

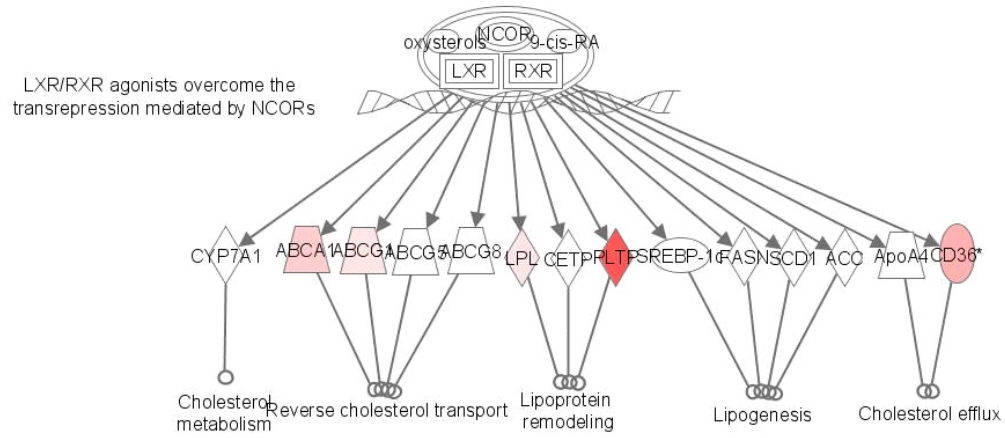

**Macrophage**

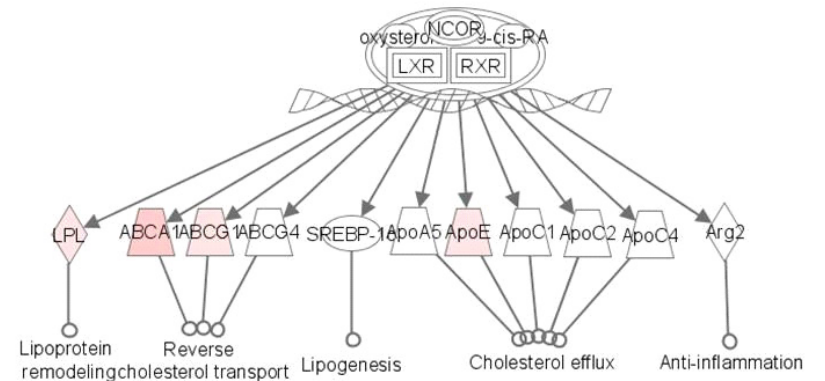

## Zhou et al., Supplemental Fig. S4

### Initiation of Complement System

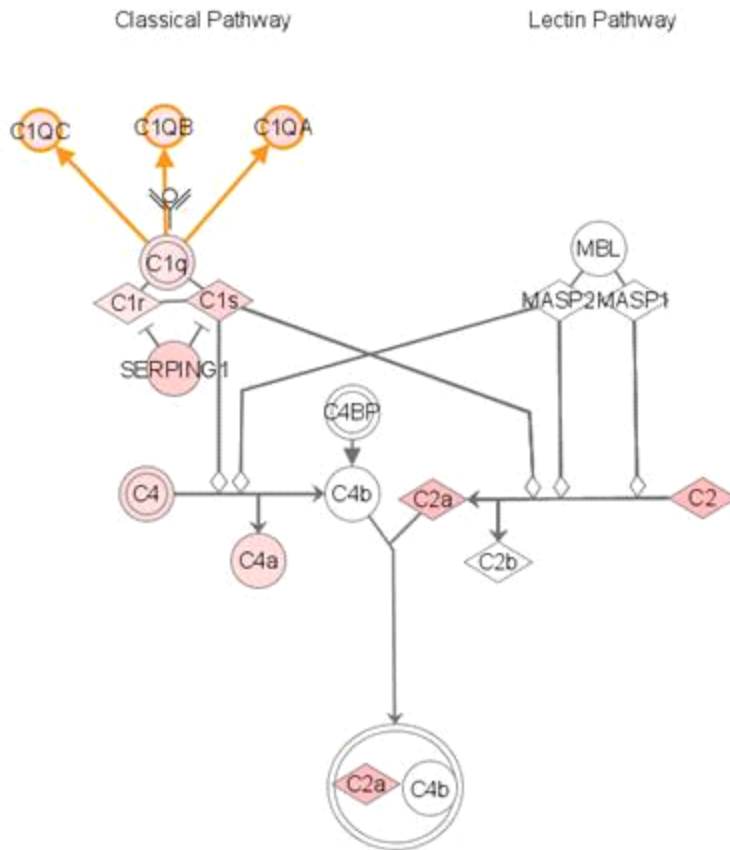

Supplement: supp_109.078048_biolreprod.109.078048-1.pdf [file supp_109.078048_biolreprod.109.078048-1.pdf]
