# Supplementary material
Source: PubMed Central journal article supplement (PMC2802113)
Supplement: supp_109.078048_biolreprod.109.078048-3.pdf [file supp_109.078048_biolreprod.109.078048-3.pdf]

Zhou et al., Supplemental Table S2. Primers and conditions used in real-time RT-PCR.

| Gene         | 5'-primer                     | 3'-primer                      |
|--------------|-------------------------------|--------------------------------|
| <i>Pah</i>   | 5'- agcctgaggaatgacattgg -3'  | 5'- tcggctccatagctgagaat -3'   |
| <i>Ces3</i>  | 5'- gatggtgcctcagaagagga -3'  | 5'- cttgtccttcagcctctgg -3'    |
| <i>Timp1</i> | 5'- tgcaactcggacctggttat -3'  | 5'- acagcgtcgaatcctttgag -3'   |
| <i>Star</i>  | 5'- cacagtcatcacccatgagc -3'  | 5'- agctctgatgacaccgcttt -3'   |
| <i>Gsta2</i> | 5'- ggagagagccctgattgaca -3'  | 5'- cagaaggctggcatcaaact -3'   |
| <i>Ctgf</i>  | 5'- aagacacatttggccctgac -3'  | 5'- cttgacaggcttggcaattt -3'   |
| <i>Espn</i>  | 5'- acctacgtacgggtgcaaacc -3' | 5'- gggatgaagacatgcctgagt -3'  |
| <i>Ace</i>   | 5'- catgtcagcctctgccatta -3'  | 5'- agttgacgcgactggactct -3'   |
| <i>Kitlg</i> | 5'- ggcctacaatggacagcaat -3'  | 5'- tcaactgcccttgtaagacttg -3' |
| <i>Tf</i>    | 5'- gtcactgccattcgaaatca -3'  | 5'- ccacactggcctgctatgta -3'   |
| <i>Igf3</i>  | 5'- tcccaactgtgacaagaagg -3'  | 5'- agctgctgatcacgttggtg -3'   |
| <i>Shbg</i>  | 5'- gacggaccctgagacacatt -3'  | 5'- cccaggttcgaaactcaaag -3'   |
| <i>Pltp</i>  | 5'- tgattaactccccgctgaag -3'  | 5'- ccttgcccttgagtgtcaac -3'   |
| <i>Cd36</i>  | 5'- ttgggaaagttattgagaca -3'  | 5'- cgttggctggaagaacaaat -3'   |
| <i>Abca1</i> | 5'- ctggccaggatattcagcat -3'  | 5'- ccttgcaaagttcacgaat -3'    |
| <i>ApoE</i>  | 5'- aaccgcttctgggattacct -3'  | 5'- agctgttctccagctcctt -3'    |
| <i>Lpl</i>   | 5'- aacattggagaagccattcg -3'  | 5'- tgctggggttttcttcattc -3'   |
| <i>Rps2</i>  | 5'- tgttctccctgcccattaag -3'  | 5'- caagaccaacgtgaccattg -3'   |

The PCR reaction contained 10 µl volume, which included 5 µl of SYBR Green JumpStart Taq Mix (Sigma-Aldrich, St. Louis, MO), 4.8 µl first strand cDNA product described above (1:150 dilution), and 0.1 µM each of specific forward and reverse primers (Sigma Genosys, Houston, TX).

Cycling conditions were as follows: 2 min 95°C hold, followed by 40 cycles of 15 sec at 95°C, 1 min at 60°C, and 1 min at 72°C. Fluorescence was measured and acquired at 72°C.

Zhou et al., Supplemental Table S3. Maximally expressed germ-cell specific and somatic-cell enriched genes.

| Gene/Probe Sets                                                                            | Expression<br>in normal<br>testis <sup>a</sup> | Expression<br>in<br>irradiated<br>testis <sup>a</sup> | Ratio<br>Irradiated<br>/Normal<br>testis | Reference <sup>b</sup> |
|--------------------------------------------------------------------------------------------|------------------------------------------------|-------------------------------------------------------|------------------------------------------|------------------------|
| <b><i>Germ cell-specific genes</i></b>                                                     |                                                |                                                       |                                          |                        |
| Germ cell associated 1 ( <i>Gsg1</i> )                                                     | 56                                             | n.d. <sup>c</sup>                                     | N/A <sup>d</sup>                         | [1]                    |
| Ornithine decarboxylase antizyme 3 ( <i>Oaz3</i> )                                         | 52                                             | n.d.                                                  | N/A                                      | [2]                    |
| Outer dense fiber of sperm tails 2 ( <i>Odf2</i> )                                         | 51                                             | n.d.                                                  | N/A                                      | [3]                    |
| Sperm mitochondria-associated cysteine-rich protein<br>( <i>Smcp</i> )                     | 50                                             | n.d.                                                  | N/A                                      | [4]                    |
| Outer dense fiber of sperm tails 1 ( <i>Odf1</i> )                                         | 50                                             | n.d.                                                  | N/A                                      | [5]                    |
| Transition protein 1 ( <i>Tnp1</i> )                                                       | 47                                             | n.d.                                                  | N/A                                      | [6]                    |
| Cysteine-rich secretory protein 2 ( <i>Crisp2</i> )                                        | 45                                             | n.d.                                                  | N/A                                      | [7]                    |
| Transition protein 2 ( <i>Tnp2</i> )                                                       | 42                                             | n.d.                                                  | N/A                                      | [6]                    |
| Heat shock protein, alpha-crystallin-related, B9<br>(predicted) ( <i>Hspb9_predicted</i> ) | 41                                             | n.d.                                                  | N/A                                      | [8]                    |
| Chemokine-like factor super family 1 ( <i>Cklfsf1</i> , now<br>known as <i>Cmtm2a</i> )    | 41                                             | n.d.                                                  | N/A                                      | [9]                    |
| <b><i>Somatic cell-enriched genes</i><sup>e</sup></b>                                      |                                                |                                                       |                                          |                        |
| Glutathione S-transferase A3 ( <i>Gsta3</i> )                                              | 7                                              | 37                                                    | 5.6                                      | [10]                   |
| Beta-2 microglobulin ( <i>B2m</i> )                                                        | 3                                              | 32                                                    | 12                                       | [11]                   |
| Integral membrane protein 2B ( <i>Itm2b</i> )                                              | 7                                              | 32                                                    | 4.6                                      | [12]                   |

|                                                                |   |    |     |      |
|----------------------------------------------------------------|---|----|-----|------|
| Hydroxyacid oxidase 2 (long chain) ( <i>Hao2</i> )             | 2 | 31 | 18  | [10] |
| Ribosomal protein S4, X-linked ( <i>Rps4x</i> )                | 3 | 31 | 12  | [13] |
| Claudin 11 ( <i>Clcn11</i> )                                   | 6 | 31 | 5.2 | [14] |
| Glutathione S-transferase, mu type 3 ( <i>Gstm3</i> )          | 6 | 31 | 5.0 | [10] |
| Prosaposin ( <i>Psap</i> )                                     | 7 | 31 | 4.3 | [15] |
| Insulin-like growth factor binding protein 7 ( <i>Igfbp7</i> ) | 3 | 30 | 9.3 | [16] |
| Cystatin 3 ( <i>Cst3</i> )                                     | 5 | 30 | 5.7 | [17] |

<sup>a</sup> Ratio of expression levels relative to the median of all probe sets that were scored as "present" by Affymetrix criteria.

<sup>b</sup> References to the literature supporting the localization of the protein to specific testicular cell subtypes. The localization of numerous genes was determined from microarray analyses of separated testicular cell fraction in references [10, 18, 16] using the GermOnline systems browser (<http://www.germonline.org>) and references [19, 20] using the Mammalian Reproductive Genetics website (<http://mrg.genetics.washington.edu>).

<sup>c</sup> n.d., not detected, scored as "absent" by Affymetrix criteria.

<sup>d</sup> N/A, not calculated due to the absence of expression after irradiation.

<sup>e</sup> Somatic genes, selected based on >4-fold increased expression due to irradiation, were ranked according to expression level in irradiated testes.

Zhou et al., Supplemental Table S4. Verification of elevated expression of LXR-target genes after irradiation.

| Gene                                                                    | Fold induction in expression after irradiation (X vs. C)--<br>Microarray | Fold induction in expression after irradiation (X vs. C)--<br>Real-time RT-PCR (n = 4) |
|-------------------------------------------------------------------------|--------------------------------------------------------------------------|----------------------------------------------------------------------------------------|
| Phospholipid transfer protein (predicted)<br>( <i>Pltp</i> _predicted)  | 48 ± 4                                                                   | 18 ± 1                                                                                 |
| Cd36 antigen ( <i>Cd36</i> )                                            | 36 ± 2                                                                   | 23 ± 3                                                                                 |
| ATP-binding cassette, sub-family A (ABC1),<br>member 1 ( <i>Abca1</i> ) | 24 ± 1                                                                   | 9 ± 1                                                                                  |
| Apolipoprotein E ( <i>ApoE</i> )                                        | 11 ± 1                                                                   | 19 ± 2                                                                                 |
| Lipoprotein lipase ( <i>Lpl</i> )                                       | 11 ± 1                                                                   | 31 ± 6                                                                                 |

Note: Fold inductions are expressed as mean ± SEM.

**REFERENCES USED IN SUPPLEMENTAL DATA**

1. Tanaka H, Yoshimura Y, Nishina Y, Nozaki M, Nojima H, Nishimune Y. Isolation and characterization of cDNA clones specifically expressed in testicular germ cells. *FEBS Lett* 1994; 355:4-10.
2. Tosaka Y, Tanaka H, Yano Y, Masai K, Nozaki M, Yomogida K, Otani S, Nojima H, Nishimune Y. Identification and characterization of testis specific ornithine decarboxylase antizyme (OAZ-t) gene: expression in haploid germ cells and polyamine-induced frameshifting. *Genes Cells* 2000; 5:265-276.
3. Hoyer-Fender S, Petersen C, Brohmann H, Rhee K, Wolgemuth DJ. Mouse Odf2 cDNAs consist of evolutionary conserved as well as highly variable sequences and encode outer dense fiber proteins of the sperm tail. *Mol Reprod Dev* 1998; 51:167-75.
4. Herr JC, Thomas D, Bush LA, Coonrod S, Khole V, Howards SS, Flickinger CJ. Sperm mitochondria-associated cysteine-rich protein (SMCP) is an autoantigen in Lewis rats. *Biol Reprod* 1999; 61:428-35.
5. Burmester S, Hoyer-Fender S 1996 Transcription and translation of the outer dense fiber gene (Odf1) during spermiogenesis in the rat. A study by in situ analyses and polysome fractionation. *Mol Reprod Dev* 45:10-20.
6. Meistrich ML. Histone and basic nuclear protein transitions in mammalian spermatogenesis. In: Hnilica LS, Stein GS, Stein JL (eds.), *Histones and Other Basic Nuclear Proteins*. CRC Press, Orlando 1989:165-182.
7. Kasahara M, Gutknecht J, Brew K, Spurr N, Goodfellow PN. Cloning and mapping of a testis-specific gene with sequence similarity to a sperm-coating glycoprotein gene. *Genomics* 1989; 5:527-534.
8. Kappe G, Verschuure P, Philipsen RL, Staalduinen AA, Van de Boogaart P, Boelens WC, De Jong WW. Characterization of two novel human small heat shock proteins: protein kinase-related HspB8 and testis-specific HspB9. *Biochim Biophys Acta* 2001; 1520:1-6.
9. Wang L, Wu C, Zheng Y, Qiu X, Wang L, Fan H, Han W, Lv B, Wang Y, Zhu X, Xu M, Ding P, Cheng S, Zhang Y, Song Q, Ma D. 2004 Molecular cloning and characterization of chemokine-like factor super family member 1 (CKLFSF1), a novel human gene with at least 23 alternative splicing isoforms in testis tissue. *Int J Biochem Cell Biol* 2004; 36:1492-501.
10. Chalmel F, Rolland AD, Niederhauser-Wiederkehr C, Chung SS, Demougin P, Gattiker A, Moore J, Patard JJ, Wolgemuth DJ, Jegou B, Primig M. The conserved transcriptome in human and rodent male gametogenesis. *Proc Natl Acad Sci USA* 2007; 104:8346-8351.
11. O'Bryan MK, Cheng CY 1997 Purification and cellular localization of beta2-microglobulin in the testis. *Life Sci* 61:487-94
12. Rengaraj D, Gao F, Liang XH, Yang ZM. Expression and regulation of type II integral membrane protein family members in mouse male reproductive tissues. *Endocrine* 2007; 31:193-201.
13. Jegalian K, Page DC. A proposed path by which genes common to mammalian X and Y chromosomes evolve to become X inactivated. *Nature* 1998; 394:776-780.
14. Hellani A, Ji J, Mauduit C, Deschildre C, Tabone E, Benahmed M. Developmental and hormonal regulation of the expression of oligodendrocyte-specific protein/claudin 11 in mouse testis. *Endocrinology* 2000; 141:3012-3019.
15. Sylvester SR, Morales C, Oko R, Griswold MD. Sulfated glycoprotein-1 (saposin precursor) in the reproductive tract of the male rat. *Biol Reprod* 1989; 41:941-948.
16. Hamra FK, Schultz N, Chapman KM, Grellhesl DM, Cronkhite JT, Hammer RE, Garbers DL. Defining the spermatogonial stem cell. *Dev Biol* 2004; 269:393-410.
17. Tsuruta JK, O'Brien DA, Griswold MD. Sertoli cell and germ cell cystatin C: stage-dependent expression of two distinct messenger ribonucleic acid transcripts in rat testes. *Biol Reprod* 1993; 49:1045-1054.
18. Schlecht U, Demougin P, Koch R, Hermida L, Wiederkehr C, Descombes P, Pineau C, Jegou B, Primig M. Expression profiling of mammalian male meiosis and gametogenesis identifies novel candidate genes for roles in the regulation of fertility. *Mol Biol Cell* 2004; 15:1031-1043
19. Shima JE, McLean DJ, McCarrey JR, Griswold MD. The murine testicular transcriptome: characterizing gene expression in the testis during the progression of spermatogenesis. *Biol Reprod* 2004; 71:319-330
20. Johnston DS, Jelinsky SA, Zhi Y, Finger JN, Kopf GS, Wright WW. Identification of testis-specific male contraceptive targets: insights from transcriptional profiling of the cycle of the rat seminiferous epithelium and purified testicular cells. *Ann NY Acad Sci* 2007; 1120:36-46.
